# Supplementary material for: Aspirin Reduces Plasma Concentrations of the Oncometabolite 2-Hydroxyglutarate: Results of a Randomized, Double-Blind, Crossover Trial
Source: Oxford University Press journal article supplement (doi:10.1158/1055-9965.epi-15-0697), 2016-01-01
Supplement: 10559965epi150697-sup-151759_2_supp_3163699_nvyvr8.doc [file 10559965epi150697-sup-151759_2_supp_3163699_nvyvr8.doc]

SUPPLEMENTARY DATA

Aspirin Reduces Plasma Concentrations of the Oncometabolite
2-Hydroxyglutarate: Results of a Randomized, Double-Blind, Crossover Trial

David B. Liesenfeld1, Akke Botma1, Nina Habermann1, Reka Toth1, Christoph Weigel2, Odilia Popanda2, Karel D. Klika3, John D. Potter4,5, Johanna W. Lampe5*, and Cornelia M. Ulrich1,5,6*

*These authors contributed equally

**Affiliations:**

1 Division of Preventive Oncology, National Center for Tumor Diseases (NCT) and German Cancer Research Center (DKFZ), Heidelberg, Germany.

2 Division of Epigenomics and Cancer Risk Factors, German Cancer Research Center (DKFZ), Heidelberg, Germany

3 Genomics and Proteomics Core Facility, Molecular Structure Analysis, German Cancer Research Center (DKFZ), Heidelberg, Germany

4 Centre for Public Health Research, Massey University, Wellington, New Zealand

5 Cancer Prevention Program, Fred Hutchinson Cancer Research Center, Seattle, WA

6 Population Sciences, Huntsman Cancer Institute, Salt Lake City, UT

SUPPLEMENTARY METHODS AND MATERIALS

*Metabolic profiling*

**Sample preparation:** Samples were prepared using an automated MicroLab STAR® system (Hamilton). Recovery standards were added prior to the first step in the extraction process for QC purposes. Sample preparation was conducted using a proprietary series of organic and aqueous extractions to remove the protein fraction while allowing maximum recovery of small molecules. The resulting extract was divided into two fractions: one for analysis by LC and one by GC. Samples were placed briefly on a TurboVap® (Zymark) to remove the organic solvent. Each sample was then frozen and dried under vacuum. Samples were then prepared for the appropriate instrument, either LC–MS or GC–MS.

**QA/QC:** For QA/QC purposes, a number of additional samples were included with each day’s analysis. Furthermore, a selection of QC compounds was added to every sample, including those under test. These compounds were carefully chosen so as not to interfere with the measurement of the endogenous compounds.

**Liquid chromatography-mass spectrometry (LC–MS, LC–MS/MS):** The LC–MS portion of the platform was based on a Waters ACQUITY UPLC and a Thermo–Finnigan LTQ mass spectrometer consisting of an electrospray ionization (ESI) source and linear ion-trap (LIT) mass analyzer. The sample extract was split into two aliquots, dried, and then reconstituted in acidic or basic LC-compatible solvents, each of which contained 11 or more injection standards at fixed concentrations. One aliquot was analyzed using acidic positive-ion optimized conditions and the other using basic negative-ion optimized conditions in two independent injections using separate dedicated columns. Extracts reconstituted in acidic conditions were gradient-eluted using water and methanol both containing 0.1% formic acid, while the basic extracts were gradient-eluted using water and methanol containing 6.5 mM ammonium bicarbonate. MS analysis alternated between MS and data-dependent MS/MS scans using dynamic exclusion.

**Gas chromatography-mass spectrometry (GC–MS):** Samples for GC–MS analysis were re-dried *in vacuo* for a minimum of 24 h prior to derivatization under dry nitrogen gas using *N*,*O*-bis(trimethylsilyl)trifluoroacetamide (BSTFA). The GC stationary phase contained 5% phenyl and the temperature ramp was from 40° to 300°C over a 16 min period. Samples were analyzed on a Thermo-Finnigan Trace DSQ fast-scanning single-quadrupole mass spectrometer using electron-impact ionization. The instrument was tuned and calibrated for mass resolution and mass accuracy on a daily basis. The information output from the raw data files was automatically extracted as described below.

**Accurate mass determination and MS/MS fragmentation (LC–MS, LC–MS/MS):** The LC–MS portion of the platform was based on a Waters ACQUITY UPLC and a Thermo-Finnigan LTQ-FT mass spectrometer, which had a linear ion-trap (LIT) front end and a Fourier transform ion cyclotron resonance (FT-ICR) mass spectrometer backend. Accurate mass measurements could readily be made on parent ions as well as fragment ions for ions with counts greater than 2 million. The typical mass error was less than 5 ppm. Fragmentation spectra (MS/MS) were typically acquired as they came without any special attention, but if necessary, targeted MS/MS was employed, this was particularly applied for signals of low intensity.

**Data extraction and QA:** The data extraction of the raw mass spectrometry data files yielded information that was loaded into a relational database where the information was examined and appropriate QC limits imposed. Peaks were identified using Metabolon’s proprietary peak integration software.

**Compound identification:** Compounds were identified by comparison to library entries of purified standards or recurrent unknown entities. Identification of known chemical entities was based on comparison to metabolomic library entries of purified standards. The combination of chromatographic properties and mass spectra gave an indication of a match to the specific compound or an isobaric entity. Additional entities could be identified by virtue of their recurrent nature, both chromatographic and mass spectral. These compounds have the potential to be identified by future acquisition of a matching purified standard or by classical structural analysis.

**Curation:** A variety of curation procedures was carried out to ensure that a high-quality data set was made available for statistical analysis and data interpretation. The QC and curation processes were designed to ensure accurate and consistent identification of true chemical entities, and to remove those representing system artifacts, mis-assignments, and background noise.

**Normalization:** For studies spanning multiple days, a data-normalization step was performed to correct variation resulting from instrument inter-day tuning differences. Essentially, each compound was corrected in run-day blocks by registering the medians to equal one (1.00) and normalizing each data point proportionately.

*Targeted profiling of (R)- and (S)-2-hydroxyglutarate in cell lines*

To extract polar metabolites from cell culture samples, an optimized protocol for cell culture metabolomics was used as previously published (1). After incubation, the culture medium was removed and the cells washed twice with phosphate buffered saline. Methanol (1.5 mL) was directly added to the cells to quench cellular metabolism and precipitate proteins. Cells were scraped off the culture dishes using a plastic cell scraper. In order to control for extraction efficacy, the methanolic solution was spiked with 1 nmol salicylic acid-*d*6 (Sigma Aldrich, St. Louis, USA) and 1 nmol 2-hydroxyglutarate-*d*4 (see synthesis below) prior to extraction.

Metabolites were extracted following literature methodology (1) using a three-phase system consisting of H2O/methanol/chloroform in the ratio 4:4:2.85 (v/v/v). Briefly, 1.5 mL of chloroform was added to the methanolic fraction and vortexed for 30 sec after which 1.1 mL H2O were added to the methanol fraction. The mixture was again vortexed for 30 sec and spun at 1,000 g for 3 min to facilitate phase separation. The aqueous phase was split into two aliquots. The first aliquot was analyzed using 1H NMR to determine total metabolite content as previously described (2). The second aliquot was dried *in vacuo* and derivatized for GC–MS analysis following literature methodology (3). Briefly, 100 µL of (*S*)-2-butanol (Sigma Aldrich, St. Louis, USA) and 10 µL of aqueous HCl (37%) were added to the dry residue. The solution was briefly vortexed and mixed for 90 min at 90°C on a thermomixer. After esterification was complete, the mixture was allowed to cool to room temperature and 200 µL of H2O (dd) were added. The solution was extracted with 400 µL of hexane by vigorous vortexing for 1 min followed by removal of the separated hexane layer which was then taken to dryness *in vacuo*. The dry residue was derivatized further with 100 µL of acetic anhydride and 20 µL of pyridine for 60 min at 80°C after which the remaining acetic anhydride and pyridine were removed *in vacuo*. Finally, the dry residue containing the *O*-acetyl-di-(*S*)-2-butyl esters of 2-hydroxyglutarate was reconstituted in 25 µL of dichloromethane and subjected to GC–MS analysis. Chromatographic parameters were used as published (4). Single ion monitoring was used to detect the diasteromeric pair of 2-hydroxyglutarate derivatives.

*Synthesis of racemic 2-hydroxyglutarate-d4 as an internal standard*

2-Oxoglutaric acid-*d*6(49.7 mg, 327 µmol, Sigma Aldrich, St. Lois, USA) was dissolved in 500 µL H2O (dd) in a 20-mL round bottom flask and stirred on ice using a magnetic stirrer. A solution of NaBH4 (40.5 mg, 1,071 µmol) in 500 µL H2O (dd) was then carefully added dropwise. After the two solutions had been combined, HCl (1 M) was added dropwise until no further production of gas could be observed. The pH of the solution was checked that is was acidic (~pH 5) and the solution left to stir for another 15 min at room temperature. The reaction mixture was transferred to a 15 mL polyethylene tube and cooled on ice. The pH of the solution was adjusted to pH 7 using NaOH (1 M) after which 3 volumes of ice-cold acetone were added to the reaction mixture. The reaction mixture was spun at 3,000 g for 5 min at 4°C. The supernatant was removed, the precipitated product washed with acetone twice, and then dried *in vacuo* until complete dryness.

The reaction produced a white, crystalline substance (38.9 mg, 256 µmol, 78% yield). The product was derivatized using a 50/50 (v/v) mixture of pyridine/BSTFA for 15 min at 50°C and checked by GC–MS (>96% pure). The EIMS of the trimethylsilylether (TMS) matched the spectrum of the non-labeled compound (2-hydroxyglutarate-TMS) after allowance for the expected mass shift of +4 Da for the isotopically labeled material (see **S-Fig 2**).

*Preparation of mitochondrial/lysosomal fraction of rat livers*

Rat liver mitochondrial/lysosomal fractions were used as a source for the hydroxyacid–oxoacid transhydrogenase (HOT) enzyme. Mitochondrial/lysosomal fractions provided by Andrea Breuer (Department of Preventive Oncology, German Cancer Research Center) were prepared as follows: Rat livers were homogenized in 3 volumes of 0.25 M sucrose solution using an Ultra-Turrax. Homogenates were subjected to differential centrifugation by firstly being spun at 1,000 g for 10 min at 0°C followed by the supernatant being subjected to ultracentrifugation at 100,000 g for 40 min at 0°C. The sediments consisting of mitochondria/lysosomes were suspended in 5 volumes of TRIS phosphate buffer (pH 7.8) and stored at −80°C.

The activity of the mitochondrial fraction was first checked by incubating 400 µL (4.0 mg total protein) with 1 mM of 2-oxoglutarate/4-hydroxybutyrate each. The formation of succinic-semialdehyde was monitored over time using 1H NMR spectroscopy by observing the characteristic signal for an aldehyde proton at 9.7 ppm.

SUPPLEMENTARY FIGURES


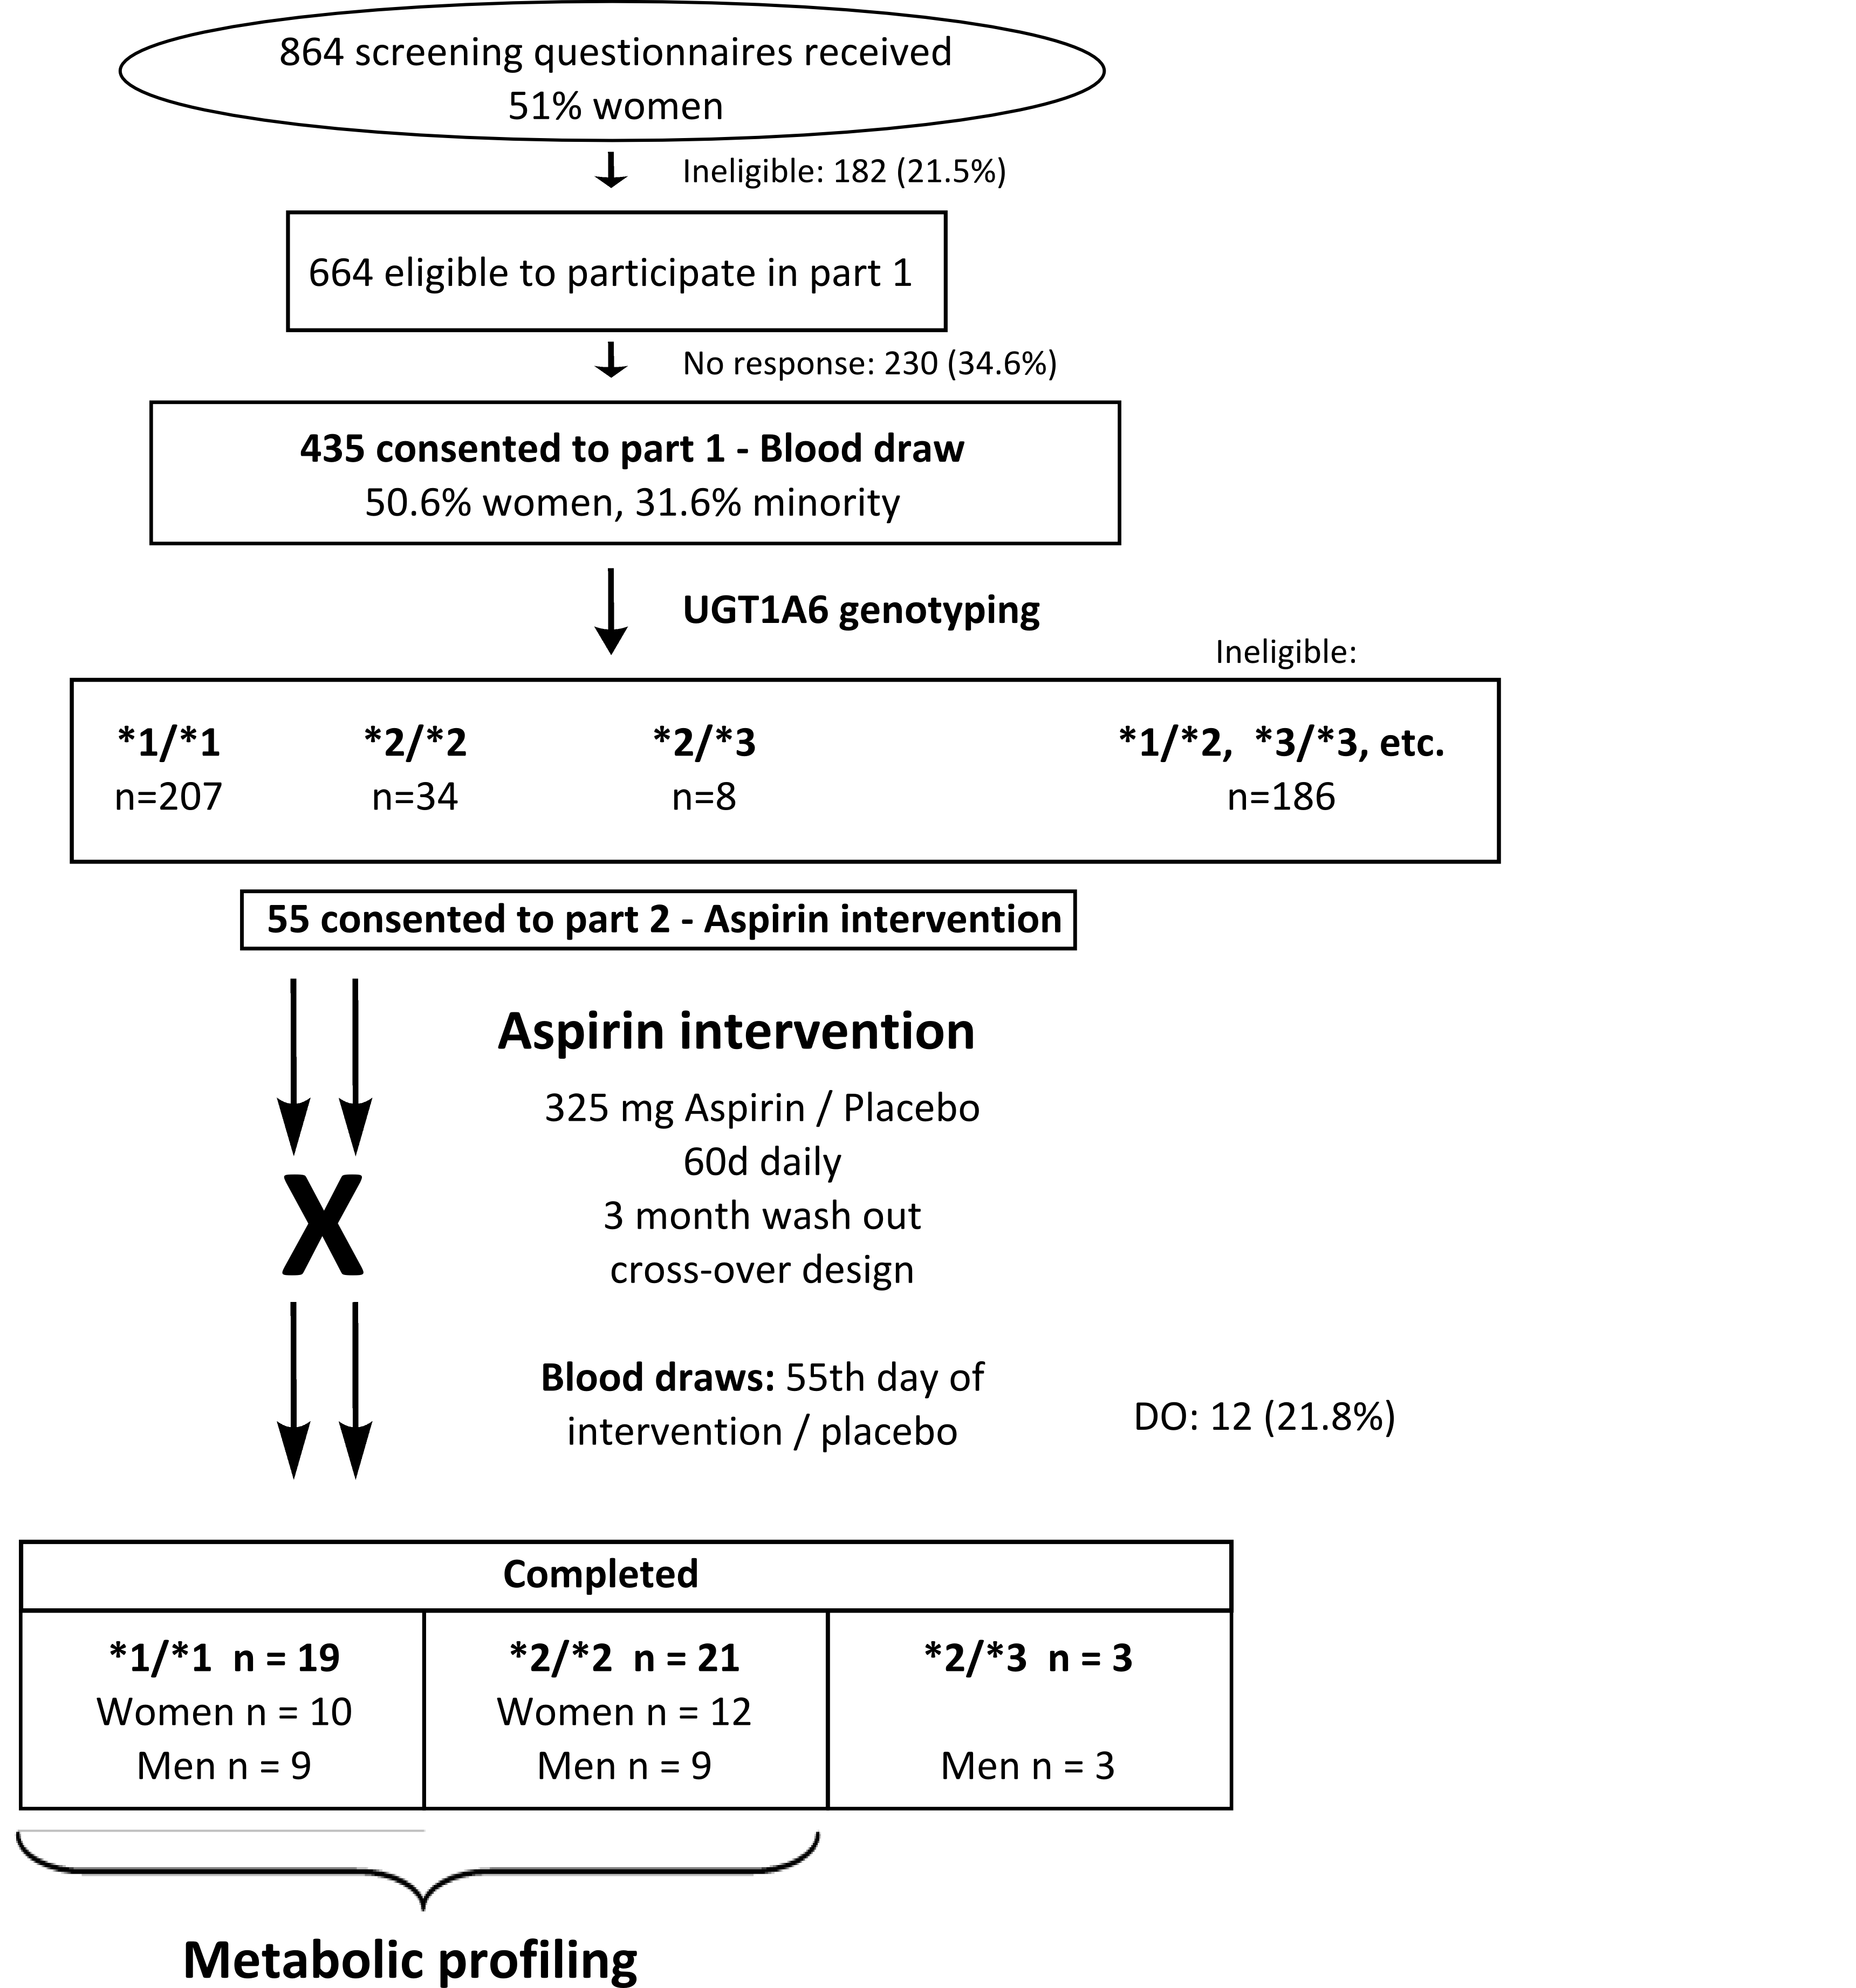


**Supplementary Figure 1:** Study design of the ABC intervention study.


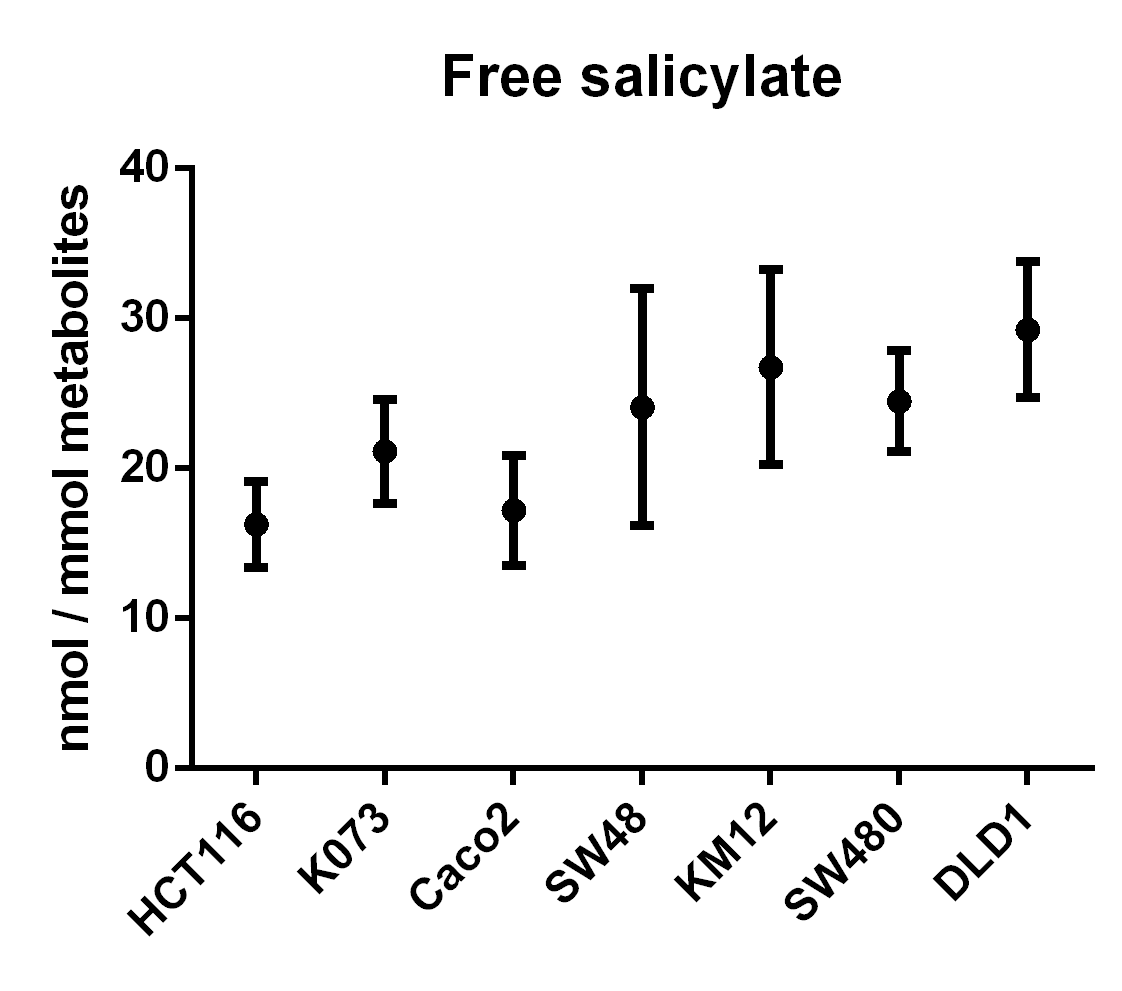


**Supplementary Figure 2:** Intracellular concentrations of free salicylate in aspirin treated colorectal cancer cell lines expressed as nmol per total mmol of metabolites. Mean ± SD are shown.


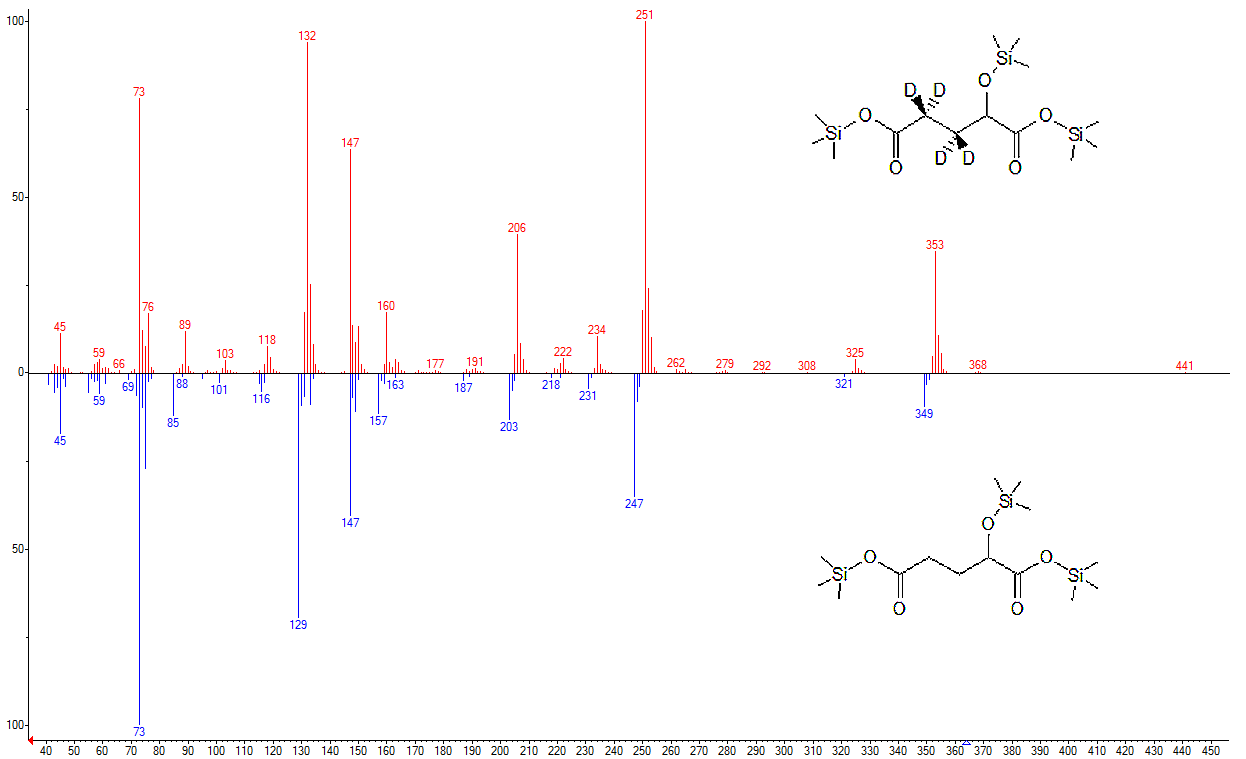


**Supplementary Figure 3:** EIMS of 2-hydroxyglutarate-*d*4 (top) and non-deuterated 2-hydroxyglutarate (bottom) in a head-to-tail plot {both derivatized as tris(trimethylsilyl) ethers}. Characteristic fragments of the isotopically labeled standard exhibit a characteristic mass shift of 4 Da.


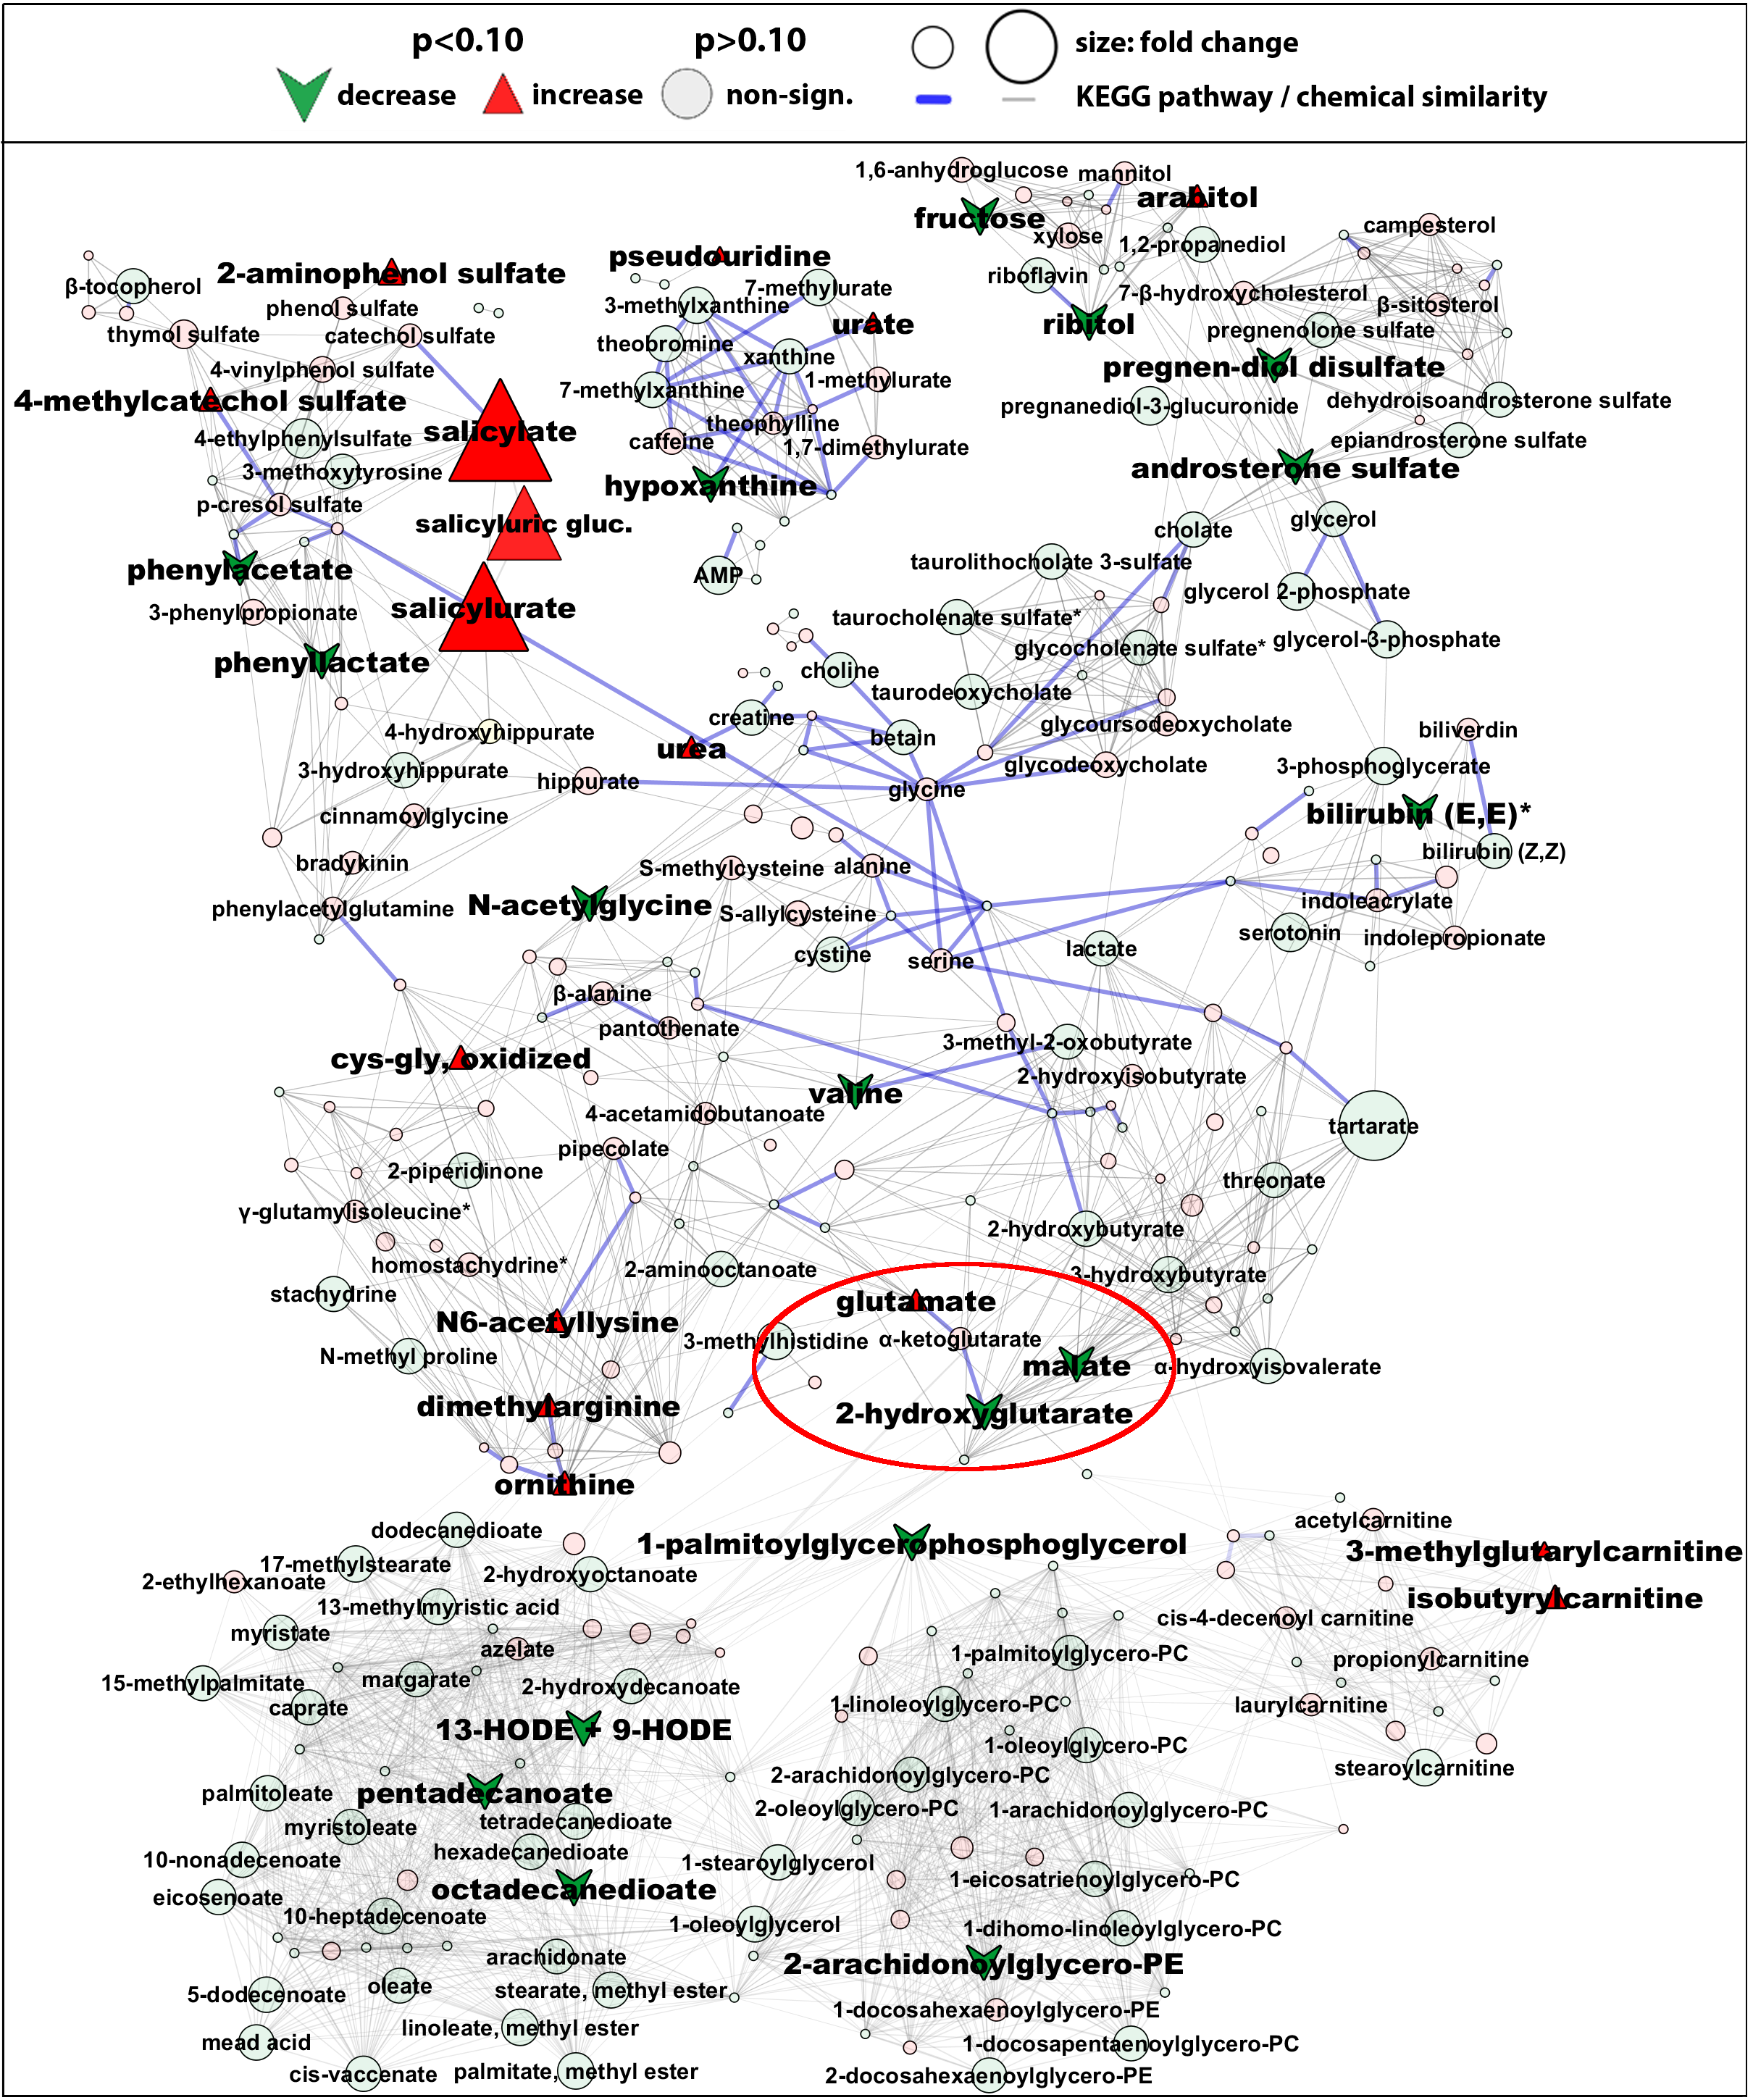


**Supplementary Figure 4:** Pathway visualization of the aspirin intervention on the plasma metabolome based on biochemical (KEGG) and chemical (Pubchem ID) similarity. Increased/decreased metabolites after the aspirin intervention were mapped with red/green triangles based on a raw *p*-value of 0.1. Size is proportional to the respective fold change of the metabolite concentrations. Only metabolites with >5% increase or decrease are labeled.

**Supplementary Table 1.** Changes in metabolite concentrations after a 60 day aspirin (325 mg/d) intervention compared to placebo intervention in the ABC study; a randomized, double-blind, crossover trial. Metabolites with a paired Wilcoxon *p* < 0.10 are presented. Fold changes were calculated for the full dataset as well as stratified by sex, genotype, BMI, dose, and age group. Fold changes <1 indicate a reduction of the metabolite after the aspirin intervention compared to placebo; fold changes >1 indicate an increase of the metabolite after the aspirin intervention

|  | **n (↑)** | | **n (↓)** | **Fold change**** | ***p*-value** | **Fold change**** | | | | | | | | | | | | | |
| --- | --- | --- | --- | --- | --- | --- | --- | --- | --- | --- | --- | --- | --- | --- | --- | --- | --- | --- | --- |
|  | |  |  | |  | | **Sex** | | | **Age1** | | | **BMI2** | | **Genotype** | | | **Dose3** | |
|  | |  | **Not stratified** | |  | **M** | | **F** | **Young** | | **Old** | **Low** | | **High** | **1*1** | **2*2** | **Low** | | **High** |
| **Changes in metabolites (*p* < 0.01)** | |  |  |  |  |  | |  |  | |  |  | |  |  |  |  | |  |
| salicylate | | 35 | 1 | 177 | **<0.001** | 304 | | 122 | 138 | | 252 | 148 | | 218 | 122 | 220 | 212 | | 152 |
| salicyluric-glucuronide | | 37 | 1 | 87 | **<0.001** | 168 | | 57 | 69 | | 123 | 70 | | 108 | 60 | 115 | 111 | | 67 |
| salicylurate | | 34 | 0 | 56 | **<0.001** | 57 | | 56 | 49 | | 65 | 43 | | 71 | 67 | 47 | 69 | | 45 |
| dimethylarginine | | 28 | 12 | 1.13 | **0.002** | 1.32* | | 1.00* | 1.21 | | 1.06 | 1.11 | | 1.15 | 1.16 | 1.10 | 1.16 | | 1.11 |
| 2-hydroxyglutarate | | 14 | 26 | 0.88 | **0.005** | 0.91 | | 0.86 | 0.85 | | 0.90 | 0.90 | | 0.86 | 0.90 | 0.86 | 0.90 | | 0.86 |
| **Changes in metabolites (*p* < 0.10)** | |  |  |  |  |  | |  |  | |  |  | |  |  |  |  | |  |
| *N*-6-acetyl lysine | | 28 | 12 | 1.14 | 0.011 | 1.20 | | 1.09 | 1.13 | | 1.15 | 1.15 | | 1.14 | 1.13 | 1.15 | 1.16 | | 1.12 |
| pregn steroid monosulfate | | 14 | 26 | 0.94 | 0.015 | 0.99 | | 0.89 | 0.92 | | 0.97 | 0.90 | | 0.98 | 0.97 | 0.92 | 0.99 | | 0.88 |
| quinate | | 32 | 16 | 0.91 | 0.015 | 0.75 | | 1.04 | 1.11 | | 0.87 | 1.05 | | 0.74 | 0.62 | 1.18 | 0.87 | | 0.90 |
| ornithine | | 24 | 16 | 1.18 | 0.021 | 1.05 | | 1.30 | 1.09 | | 1.29 | 1.17 | | 1.18 | 1.18 | 1.17 | 1.18 | | 1.17 |
| phenylacetate | | 30 | 18 | 0.98 | 0.022 | 0.98 | | 0.98 | 0.98 | | 0.97 | 0.64 | | 1.33 | 0.95 | 1.03 | 1.29 | | 0.65 |
| fructose | | 16 | 24 | 0.75 | 0.026 | 0.75 | | 0.75 | 0.68 | | 0.82 | 0.66 | | 0.85 | 0.80 | 0.71 | 0.88 | | 0.64 |
| 1-methylhistidine | | 29 | 17 | 0.99 | 0.031 | 0.99 | | 1.05 | 1.13 | | 0.86 | 1.05 | | 0.93 | 1.00 | 0.99 | 1.00 | | 0.99 |
| 4-methylcatechol sulfate | | 23 | 17 | 1.19 | 0.036 | 1.25 | | 1.12 | 1.25 | | 1.14 | 1.06 | | 1.28 | 1.38 | 1.05 | 1.30 | | 1.04 |
| 3-methylglutarylcarnitine | | 17 | 28 | 1.02 | 0.037 | 1.05 | | 1.01 | 0.99 | | 1.04 | 1.00 | | 1.05 | 1.11 | 0.95 | 1.08 | | 0.91 |
| hypoxanthine | | 17 | 24 | 0.85 | 0.037 | 0.87 | | 0.85 | 0.73 | | 0.98 | 0.78 | | 0.92 | 0.78 | 0.91 | 0.84 | | 0.87 |
| octadecanedioate | | 12 | 29 | 0.83 | 0.037 | 1.00 | | 0.71 | 0.86 | | 0.81 | 0.93 | | 0.75 | 0.83 | 0.83 | 0.86 | | 0.80 |
| pseudouridine | | 21 | 19 | 1.02 | 0.042 | 1.04 | | 1.01 | 1.02 | | 1.02 | 1.01 | | 1.04 | 1.03 | 1.01 | 1.04 | | 1.00 |
| cys-gly, oxidized | | 24 | 16 | 1.16 | 0.042 | 1.24 | | 1.07 | 1.11 | | 1.23 | 1.12 | | 1.20 | 1.18 | 1.14 | 1.22 | | 1.10 |
| androsterone sulfate | | 14 | 26 | 0.89 | 0.042 | 0.92 | | 0.87 | 0.88 | | 0.90 | 0.91 | | 0.86 | 0.93 | 0.86 | 0.90 | | 0.88 |
| pregnen-diol disulfate | | 15 | 25 | 0.95 | 0.044 | 1.00 | | 0.89 | 0.98 | | 0.91 | 0.95 | | 0.95 | 0.96 | 0.94 | 0.97 | | 0.91 |
| ribitol | | 16 | 24 | 0.85 | 0.051 | 0.98 | | 0.76 | 0.79 | | 0.90 | 0.82 | | 0.88 | 0.85 | 0.85 | 0.94 | | 0.78 |
| isobutyrylcarnitine | | 26 | 14 | 1.14 | 0.051 | 1.22 | | 1.07 | 1.10 | | 1.19 | 1.03 | | 1.29 | 1.21 | 1.09 | 1.25 | | 1.05 |
| pentadecanoate (15:0) | | 13 | 27 | 0.88 | 0.055 | 0.93 | | 0.84 | 0.95 | | 0.82 | 0.93 | | 0.83 | 0.78 | 0.98 | 0.82 | | 0.94 |
| *N*-acetyl glycine | | 14 | 26 | 0.88 | 0.062 | 0.99 | | 0.82 | 0.92 | | 0.83 | 0.86 | | 0.90 | 0.74 | 1.01 | 0.96 | | 0.82 |
| valine | | 13 | 27 | 0.95 | 0.064 | 1.00 | | 0.91 | 0.95 | | 0.96 | 0.88* | | 1.02* | 0.97 | 0.94 | 1.01 | | 0.90 |
| urea | | 25 | 15 | 1.05 | 0.066 | 1.05 | | 1.05 | 1.04 | | 1.06 | 1.02 | | 1.08 | 1.05 | 1.05 | 1.07 | | 1.04 |
| 1-palmitoylglycerophosphoglycerol | | 13 | 27 | 0.81 | 0.068 | 0.81 | | 0.79 | 0.89 | | 0.74 | 0.86 | | 0.75 | 0.83 | 0.80 | 0.89 | | 0.74 |
| arabitol | | 21 | 19 | 1.08 | 0.079 | 1.05 | | 1.11 | 1.03 | | 1.13 | 1.06 | | 1.10 | 1.10 | 1.06 | 1.08 | | 1.08 |
| phenyllactate | | 14 | 26 | 0.91 | 0.082 | 0.91 | | 0.89 | 0.95 | | 0.87 | 0.88 | | 0.94 | 0.89 | 0.93 | 0.94 | | 0.88 |
| 2-arachidonoyl-glycerophosphoethanolamine | | 16 | 24 | 0.93 | 0.087 | 0.93 | | 0.92 | 0.85 | | 1.02 | 0.81 | | 1.06 | 0.82 | 1.04 | 1.10 | | 0.78 |
| 2-aminophenol sulfate | | 25 | 18 | 1.36 | 0.088 | 1.61 | | 1.17 | 1.26 | | 1.45 | 1.26 | | 1.49 | 1.38 | 1.35 | 1.48 | | 1.25 |
| bilirubin (*E,E*) | | 14 | 26 | 0.92 | 0.089 | 0.94 | | 0.90 | 0.96 | | 0.87 | 0.93 | | 0.91 | 0.86 | 0.96 | 0.89 | | 0.94 |
| urate | | 26 | 14 | 1.04 | 0.092 | 1.04 | | 1.03 | 1.02 | | 1.05 | 1.01 | | 1.06 | 1.03 | 1.04 | 1.06 | | 1.01 |
| malate | | 16 | 24 | 0.94 | 0.092 | 0.94 | | 0.93 | 0.94 | | 0.93 | 0.94 | | 0.93 | 0.94 | 0.93 | 0.97 | | 0.91 |
| 13-HODE + 9-HODE | | 14 | 26 | 0.93 | 0.094 | 0.87 | | 0.98 | 0.94 | | 0.92 | 1.01 | | 0.85 | 0.89 | 0.97 | 0.85 | | 1.02 |

* Difference between the two groups significant at a level of *p* < 0.01

** Fold changes for salicylate, salicylurate, and salicyluric-glucuronide were below the detection limit in 38, 32, and 44 samples, respectively. Instances occurred mainly in the placebo group. In order to calculate a fold change these missing values have been replaced by half the minimum observed value for the respective metabolite

1Age group young: 21.3 – 31.1 y; old: 31.2 – 44.2 y.

2BMI group low: 19.4 – 24.9 kg/m2; high: 25.0 – 44.7 kg/m2.

3Dose group low: 2.2 – 4.2 mg/kg; high: 4.3 – 6.2 mg/kg.

13-HODE: 13-hydroxy- 9,11-octadecadienoic acid; 9-HODE: 9-hydroxy-9,11-octadecadienoic acid

SUPPLEMENTARY REFERENCES

1. Teng Q, Huang W, Collette T, Ekman D, Tan C. A direct cell quenching method for cell-culture based metabolomics. Metabolomics. 2009;5:199-208..

2. Liesenfeld D, Habermann N, Toth R, Owen R, Frei E, Böhm J, et al. Changes in urinary metabolic profiles of colorectal cancer patients enrolled in a prospective cohort study (ColoCare). Metabolomics. 2014:1-15.

3. Engqvist MK, Kuhn A, Wienstroer J, Weber K, Jansen EE, Jakobs C, et al. Plant D-2-hydroxyglutarate dehydrogenase participates in the catabolism of lysine especially during senescence. The Journal of biological chemistry. 2011;286:11382-90.

4. Gibson KM, Ten Brink HJ, Schor DSM, Kok RM, Bootsma AH, Hoffmann GF, et al. Stable-Isotope Dilution Analysis of d- and l-2-Hydroxyglutaric Acid: Application to the Detection and Prenatal Diagnosis of d- and l-2-Hydroxyglutaric Acidemias. Pediatr. Res. 1993;34:277–80.
